# Supplementary material
Source: PubMed Central journal article supplement (PMC9422436)
Supplement: NIHMS1830873-supplement-Supplemental_Tables.pdf [file NIHMS1830873-supplement-Supplemental_Tables.pdf]

**Supplemental Tables:**

**Supplemental Table 1. Comparison of Rates of 10-2 VF Loss between inferiorly located DH and Non-DH Eyes**

|                                                   | DH Group             | Non-DH Group         | Difference           | P value (adjusted)   |
|---------------------------------------------------|----------------------|----------------------|----------------------|----------------------|
|                                                   | Mean (95% CI)        | Mean (95% CI)        |                      |                      |
| No. of Eyes                                       | 28                   | 304                  |                      |                      |
| <b>Central MD Change Rate (dB/year)</b>           |                      |                      |                      |                      |
| Global 10-2                                       | -0.40 (-0.60, -0.21) | -0.15 (-0.21, -0.09) | -0.26 (-0.46, -0.06) | <b>0.012 (0.008)</b> |
| <b>Central Hemifield MD Change Rate (dB/year)</b> |                      |                      |                      |                      |
| Superior                                          | -0.40 (-0.60, -0.20) | -0.16 (-0.22, -0.10) | -0.24 (-0.45, -0.03) | <b>0.026 (0.021)</b> |
| Inferior                                          | -0.24 (-0.42, -0.05) | -0.14 (-0.20, -0.08) | -0.10 (-0.29, 0.10)  | 0.334 (0.306)        |
| <b>Zonal MD Change Rate (dB/year)</b>             |                      |                      |                      |                      |
| Zone 1 (superior nasal)                           | -0.51 (-0.75, -0.27) | -0.20 (-0.27, -0.13) | -0.31 (-0.56, -0.06) | <b>0.016 (0.012)</b> |
| Zone 2 (superior temporal)                        | -0.68 (-0.98, -0.39) | -0.25 (-0.33, -0.16) | -0.44 (-0.75, -0.13) | <b>0.005 (0.003)</b> |
| Zone 3 (superior temporal band)                   | -0.25 (-0.51, 0.01)  | -0.18 (-0.26, -0.10) | -0.07 (-0.34, 0.20)  | 0.622 (0.598)        |
| Zone 4 (inferior temporal)                        | -0.03 (-0.3, 0.24)   | -0.20 (-0.28, -0.12) | 0.17 (-0.12, 0.45)   | 0.253 (0.255)        |
| Zone 5 (inferior nasal)                           | -0.25 (-0.44, -0.05) | -0.14 (-0.20, -0.08) | -0.11 (-0.32, 0.09)  | 0.290 (0.268)        |

DH = disc hemorrhage; MD = mean deviation; VF = visual field. Values are shown in mean (95% confidence interval), unless otherwise indicated. P values were adjusted for age and baseline 24-2 MD. Statistically significant P values are shown in bold.

**Supplemental Table 2. Comparison of Rates of VF Loss between DH and Non-DH Eyes in Early Glaucoma.**

|                                                   | DH Group             | Non-DH Group         | Difference           | P value (adjusted)           |
|---------------------------------------------------|----------------------|----------------------|----------------------|------------------------------|
|                                                   | Mean (95% CI)        | Mean (95% CI)        |                      |                              |
| No. of Eye                                        | 32                   | 234                  |                      |                              |
| <b>24-2 MD Change Rate (dB/year)</b>              |                      |                      |                      |                              |
| Global 24-2                                       | -0.24 (-0.35, -0.14) | -0.10 (-0.13, -0.06) | -0.15 (-0.26, -0.03) | 0.011( 0.073)                |
| <b>Central MD Change Rate (dB/year)</b>           |                      |                      |                      |                              |
| Global 10-2                                       | -0.56 (-0.71, -0.40) | -0.10 (-0.16, -0.04) | -0.46 (-0.62, -0.29) | <b>&lt;0.001 (&lt;0.001)</b> |
| <b>Central Hemifield MD Change Rate (dB/year)</b> |                      |                      |                      |                              |
| Superior                                          | -0.52 (-0.67, -0.38) | -0.13 (-0.18, -0.08) | -0.39 (-0.55, -0.24) | <b>&lt;0.001 (&lt;0.001)</b> |
| Inferior                                          | -0.35 (-0.48, -0.22) | -0.10 (-0.14, -0.05) | -0.25 (-0.39, -0.11) | <b>&lt;0.001 (0.001)</b>     |
| <b>Zonal MD Change Rate (dB/year)</b>             |                      |                      |                      |                              |
| Zone 1 (superior nasal)                           | -0.63 (-0.79, -0.46) | -0.14 (-0.2, -0.08)  | -0.49 (-0.66, -0.32) | <b>&lt;0.001 (&lt;0.001)</b> |
| Zone 2 (superior temporal)                        | -0.69 (-0.90, -0.47) | -0.21 (-0.29, -0.13) | -0.48 (-0.71, -0.25) | <b>&lt;0.001 (&lt;0.001)</b> |
| Zone 3 (superior temporal band)                   | -0.48 (-0.68, -0.29) | -0.14 (-0.21, -0.07) | -0.35 (-0.55, -0.14) | <b>0.001 (0.002)</b>         |
| Zone 4 (inferior temporal)                        | -0.32 (-0.52, -0.13) | -0.14 (-0.22, -0.07) | -0.18 (-0.39, 0.02)  | 0.084 (0.100)                |
| Zone 5 (inferior nasal)                           | -0.34 (0.07, 0.00)   | -0.09 (-0.14, -0.04) | -0.25 (0.07, 0.00)   | <b>&lt;0.001 (0.001)</b>     |

DH = disc hemorrhage; MD = mean deviation; VF = visual field. Values are shown in mean (95% confidence interval), unless otherwise indicated. P values were adjusted for age and baseline 24-2 MD. Statistically significant P values are shown in bold.

**Supplemental Table 3. Factors Contributing to the 10-2 VF Loss assessed by clustered PLR in Study Participants using Univariable and Multivariable Logistic Regression Analysis in Early Glaucoma.**

| Variables | Univariate Model | Multivariable Model I | Multivariable Model II |
|-----------|------------------|-----------------------|------------------------|
|-----------|------------------|-----------------------|------------------------|

|                                        | Odds ratio,<br>95% CI | <i>P</i><br>value | Odds ratio,<br>95 % CI | <i>P</i><br>value | Odds ratio,<br>95 % CI | <i>P</i><br>value |
|----------------------------------------|-----------------------|-------------------|------------------------|-------------------|------------------------|-------------------|
| Age, per 10 year older                 | 10.05 (9.57, 10.55)   | 0.852             | 9.97 (9.46, 10.51)     | 0.900             | 10.05 (9.53, 10.59)    | 0.863             |
| Gender: M/F                            | 0.82 (0.34, 1.96)     | 0.651             |                        |                   |                        |                   |
| Race :                                 |                       |                   |                        |                   |                        |                   |
| African American/ Non-African American | 1.64 (0.59, 4.52)     | 0.343             |                        |                   |                        |                   |
| Axial length, per 1mm longer           | 0.95 (0.68, 1.32)     | 0.757             |                        |                   |                        |                   |
| CCT, per 10 $\mu$ m thinner            | 10.02 (9.92, 10.11)   | 0.722             |                        |                   |                        |                   |
| Self-reported diabetes                 | 0.73 (0.29, 1.82)     | 0.748             |                        |                   |                        |                   |
| Self-reported hypertension             | 0.99 (0.94, 1.05)     | 0.496             |                        |                   |                        |                   |
| MOPP, per 1 mmHg higher                | 0.96 (0.86, 1.06)     | 0.803             |                        |                   |                        |                   |
| Baseline IOP, per 1 mmHg higher        | 0.96 (0.86, 1.06)     | 0.413             |                        |                   |                        |                   |
| Mean IOP, per 1 mmHg higher            | 0.98 (0.86, 1.11)     | 0.737             | 1.01 (0.88, 1.17)      | 0.843             | 1.00 (0.87, 1.14)      | 0.960             |
| History of disc hemorrhage             | 4.86 (1.79, 13.2)     | <b>0.002</b>      | 4.07 (1.47, 11.24)     | <b>0.007</b>      | 4.30 (1.63, 11.37)     | <b>0.003</b>      |
| Baseline MD 10-2, per 1 dB worse       | 1.06 ( 0.95, 1.18 )   | 0.274             |                        |                   |                        |                   |
| Baseline MD 24-2, per 1 dB worse       | 1.33 ( 1.11, 1.59 )   | <b>0.002</b>      | 1.32 ( 1.08, 1.6 )     | <b>0.006</b>      |                        |                   |
| Follow-up time                         | 1.09 (0.87, 1.37)     | 0.438             |                        |                   |                        |                   |

CCT = central corneal thickness; F = female; IOP = intraocular pressure; M = male; MD = mean deviation; MOPP = mean ocular perfusion pressure; VF = visual field. Values are shown in odds ratio (95% confidence interval), unless otherwise indicated. Age, mean IOP and variables with a P value of less than 0.10 in the univariable analysis were included in the multivariable model. Statistically significant P values are shown in bold.
